# Supplementary material for: Manipulation of natural transformation by AbaR-type islands promotes fixation of antibiotic resistance in Acinetobacter baumannii
Source: PubMed Central journal article supplement — Proc Natl Acad Sci U S A. 2024 Sep 17;121(39):e2409843121. doi: 10.1073/pnas.2409843121 (PMC11441513; doi:10.1073/pnas.2409843121), 2024-09-17
Supplement: pnas.2409843121.sapp.pdf [file pnas.2409843121.sapp.pdf]

## 1 Supporting Information for

### 2 Manipulation of natural transformation by AbaR-type islands promotes fixation of 3 antibiotic resistance in *Acinetobacter baumannii* populations

4 Rémi Tuffet<sup>a,b,‡</sup>, Gabriel Carvalho<sup>b,‡</sup>, Anne-Sophie Godeux<sup>a,c,‡</sup>, Fanny Mazzamurro<sup>d,e</sup>, Eduardo P. C. Rocha<sup>d</sup>,  
5 Maria-Halima Laaberki<sup>a,c,#@</sup>, Samuel Venner<sup>b,#@</sup>, Xavier Charpentier<sup>a,#,@</sup>

6 <sup>a</sup> CIRI, Centre International de Recherche en Infectiologie, Inserm, U1111, Université Claude Bernard Lyon 1, CNRS,  
7 UMR5308, École Normale Supérieure de Lyon, Univ Lyon, 69100, Villeurbanne, France

8 <sup>b</sup> UMR CNRS 5558 – LBBE "Laboratoire de Biométrie et Biologie Évolutive", Université Claude Bernard Lyon 1, Villeurbanne,  
9 France.

10 <sup>c</sup> Université de Lyon, VetAgro Sup, 69280 Marcy l'Etoile, France.

11 <sup>d</sup> Institut Pasteur, Université Paris Cité, CNRS UMR3525, Microbial Evolutionary Genomics, Paris, 75015, France.

12 <sup>e</sup> Collège Doctoral – Sorbonne Université, F-75005 Paris, France – France

13 ‡, contributed equally. #, co-senior authors.

14 @, Correspondence to:

15 Maria-Halima Laaberki, [maria-halima.laaberki@vetagro-sup.fr](mailto:maria-halima.laaberki@vetagro-sup.fr) (experimental work)

16 Samuel Venner, [samuel.venner@univ-lyon1.fr](mailto:samuel.venner@univ-lyon1.fr) (computational work)

17 Xavier Charpentier, [xavier.charpentier@univ-lyon1.fr](mailto:xavier.charpentier@univ-lyon1.fr)

18 This PDF file includes

19 Supporting text: Computational model

20 [Table S1](#): Gene content and acquisition time of the *abaR* disrupting *comM* in strains with *abaR*-disrupted  
21 *comM*

22 [Computation model](#)

23 [Table S2](#): Parameters used in the model.

24 [Table S3](#): Genotypes nomenclature and phenotypes of the 3 sites model.

25 [Table S4](#): Genotypes nomenclature and phenotypes of the 4 sites model.

26 [Table S5](#): Transformation event probabilities used in the model.

27 [Table S6](#): Genotype transition in the 3 sites model.

28 [Table S7](#): Bacterial strains and plasmids used in this study.

29 [Table S8](#): Primers used in this study.

30 [Figure S1](#). Strategy and mutant construction to quantify events of acquisition or deletion of a heterologous  
31 DNA fragment occurring within mixed populations.

32 [Figure S2](#). Quantification of gene transfer rate (acquisition and deletion, as a function of length) occurring  
33 within populations.

34 [Figure S3](#). A mathematical model of the *A. baumannii* population involving HGT by natural transformation.

35 [Figure S4](#). Frequency of AbaR islands, island-carrying cells and SNP-carrying cells in fluctuating  
36 environments.

37 [Figure S5](#). Illustration of the quasi-neutrality between *comM*::AbaR and *pilT*::AbaR.

## 38 **Supporting text**

### 39 **Computational model**

40 We have developed a stochastic computational model, inspired by an earlier model (1). The model is composed  
41 of two compartments: bacterial cells (intracellular compartment) and extracellular DNA (eDNA within the  
42 extracellular compartment). Bacteria possess several insertion sites on their chromosome which can be  
43 occupied by two types of DNA each. Bacteria can uptake eDNA from the extracellular compartment and replace  
44 their own using transformation. Bacteria release DNA into the extracellular compartment upon cell lysis which  
45 can be enhanced by a stochastic bactericidal stress.

46 In the first stage, the environmental fluctuations only concern exposure to stress 1 (which occurs randomly,  
47 see Fluctuating stress below), for which resistance is conferred by AbaR (Figure 3 and S3). Insertion sites of  
48 AbaRs include three genes, *comM*, *pilT* and *pho*. These sites can be occupied by their respective wild-type allele  
49 (*comM*, *pilT* or *pho*) or by their respective AbaR genomic island (*comM*::AbaR, *pilT*::AbaR or *pho*::AbaR). In  
50 accordance with experimental results, the frequency of natural transformation can be affected by the insertion of  
51 an AbaR that inactivates the gene (see Figure 2 and SI appendix Table S2) This frequency is unchanged when  
52 the *pho* gene is inactivated, is reduced when the *comM* gene is inactivated and is dropped to 0 when the *pilT*  
53 gene is inactivated. The  $n=2^3=8$  different bacterial genotypes, along with their resistance phenotypes, natural  
54 transformation phenotypes and replication costs are listed in Table S3.

55 In the second stage, we model more complex environmental fluctuations. In addition to stress 1, we have  
56 introduced either a new stress that reduces the survival of non-resistant bacteria (see Fluctuating stress below),  
57 or a change in resource for bacterial growth (bacteria that do not have the allele adapted to this new resource  
58 have a lower growth capacity, see Fluctuating resource below). In the latter two cases, adaptation to the new  
59 environment is conferred by a new single nucleotide polymorphism (SNP) that can be acquired by transformation  
60 and that integrates into a new site. This additional site can be occupied by a wild type allele or by the SNP. The  
61 inactivation of the *comM* gene, by insertion of an AbaR, only slightly inhibits the acquisition of SNPs by  
62 transformation, whereas insertion of an AbaR in the *pilT* gene totally inhibits it (see figure 2C). The  $n=2^4=16$   
63 different bacterial genotypes, along with their resistance phenotypes, natural transformation phenotypes and  
64 replication costs are listed in Table S4.

65 Model processes

66 Bacterial population growth follows a logistic model and the number of replicating cells per genotype  $i$  and  
67 per time step  $dt$ ,  $G_{i,t+dt}$  is determined using a binomial distribution:

68 
$$G_{i,t+dt} \sim \text{Bin}(\mu_{i,t} \cdot dt, N_{i,t}) \quad (1)$$

69 where 
$$\mu_{i,t} = \left( \mu_{max} - \frac{\mu_{max} - k_b}{K} N_{tot,t} \right) * (1 - c_i). \quad (2)$$

70  $N_{i,t}$  is the number of cells with the genotype  $i$  at time  $t$ .  $\mu_{i,t}$  is the replication rate of genotype  $i$  at time  $t$ .  
71  $\mu_{max}$  is the maximal growth rate per capita.  $k_b$  is the constant basal lysis rate per capita, which allows the  
72 extracellular compartment to be supplied, independently of the presence of stress.  $N_{tot,t}$  is the total number of  
73 cells in the population (considering all genotypes) at time  $t$ .  $c_i$  is the cost, in terms of cell replication, induced by  
74 all DNA types possessed by the genotype  $i$ .  $K$  is the carrying capacity. The number of lysed cells per time step  
75  $L_{i,t+dt}$  is calculated using a binomial distribution:

76 
$$L_{i,t+dt} \sim \text{Bin}(k_{i,t} \cdot dt, N_{i,t}) \quad (3)$$

77 where  $k_{i,t}$  is the lysis rate of genotype  $i$  at time  $t$  which depends on both the basal lysis rate and exposure  
78 to environmental stress (see Modeling environmental fluctuations). To optimize calculation time, the natural  
79 transformation mechanism is modeled as two successive processes. First the number of competent cells  
80 engaging in a transformation event during a time step  $C_{i,t+dt}$  is determined using the following binomial  
81 distribution:

82 
$$C_{i,t+dt} \sim \text{Bin}(T_{i,t} \cdot dt, N_{i,t}) \quad (4)$$

83 
$$T_{i,t} = T_{max,i} \left( \frac{A_{tot,t}}{1 + A_{tot,t}} \right) \quad (5)$$

84 where  $T_{i,t}$  is the transformation rate at time  $t$ ,  $T_{max,i}$  is the maximal transformation rate per capita (i.e. the  
85 expected rate of transformation in the absence of any limiting constraint: (i) when the eDNA is not limiting, (ii)  
86 transformation is not inhibited and (iii) the cell acquires a short sequence - either a WT allele or a SNP - of the  
87 genotype  $i$ ),  $A_{tot,t}$  is the total number of eDNA at time  $t$ .

88 Second, the number of competent cells undergoing a transformation event  $C_{i,t+dt}$  is distributed between the  
 89 different bacterial genotypes using a multinomial distribution as follows:

$$\left( C_{t+dt}^{i \rightarrow j} \right)_{j=0, \dots, n-1} = \text{Multinomial} \left( C_{i,t+dt}, \gamma_{i, \cdot} \right)$$

90 where  $\gamma_{i, \cdot}$  is a probability vector that takes into account the relative frequency of the different eDNA molecules,  
 91 corrected by their acquisition success rate (see Table S5). This success rate depends on both the bacterial  
 92 genotype (transformation inhibition or not) and the molecule to be integrated (AbaR on the one hand, or SNP  
 93 and WT on the other) (see Table S6).

94 Cells undergoing a transformation event change their genotype according to the DNA type integrated (see  
 95 Table S6). The overall variation of a genotype  $i$  during a time step is summarized by:

$$N_{i,t+dt} = N_{i,t} + G_{i,t+dt} - L_{i,t+dt} - C_{t+dt}^{i \rightarrow !i} + C_{t+dt}^{!i \rightarrow i} \quad (6)$$

96 where  $C_{t+dt}^{i \rightarrow !i}$  is the number of competent cells going from the genotype  $i$  to a different genotype and  $C_{t+dt}^{!i \rightarrow i}$   
 97 is the number of cells becoming of genotype  $i$  from a different genotype.  
 98

99 In the extracellular compartment, eDNA is degraded at a constant rate per capita  $Dg_j$ . The number of  
 100 degraded eDNA molecules  $j$  per time step,  $D_{j,t+dt}$  is determined using a binomial distribution

$$D_{j,t+dt} \sim \text{Bin} \left( Dg_j \cdot dt, A_{j,t} \right) \quad (7)$$

101 where  $A_{j,t}$  corresponds to the number of eDNA of type  $j$ . The extracellular compartment is supplied by  
 102 eDNA from lysed cells, each lysed cell releasing DNA molecules corresponding to their DNA composition. In  
 103 addition, eDNA is added at a marginal rate simulating residual arrival from neighboring populations (open  
 104 system), which prevents the total loss of the various eDNAs in the system. The number of eDNA molecules  $j$   
 105 added per time step  $M_j$  is defined by:

$$M_j = M_{input, j} \cdot dt \quad (8)$$

106 where  $M_{input, j}$  is the number of molecules of eDNA of type  $j$ , is residual and set to be orders of magnitude  
 107 lower than the DNA released by cell lysis. The overall variation of eDNA of type  $j$  in the extracellular  
 108 compartment during a time step is determined as follows by:  
 109  
 110

111 
$$A_{j,t+dt} = A_{j,t} - D_{j,t+dt} + M_j + \sum_{i=1}^n [L_{i,t+dt}^j - C_{i,t+dt}^j] \quad (9)$$

112 where  $L_{i,t+dt}^j$  is the number of cells of genotype  $i$  (containing DNA of type  $j$ ) which are lysed and  $C_{i,t+dt}^j$  is  
 113 the number of DNA molecules of type  $j$  which are acquired by competent cells.

114 Modeling environmental fluctuations

115 Fluctuating stress

116 The bacterial population is exposed either to a single stress (stress 1, Figure 3, Figure 4D) or to two  
 117 stresses (stress 1 and 2, figure 4A, 4B and 4C). In all these simulations AbaRs confer resistance to stress 1  
 118 while the SNP confer resistance to stress 2 (Figure 4, rows 1-3) .

119 When there is only stress 1 (Figure 3 and 4D), the lysis rate for genotype  $i$  at time  $t$  is therefore calculated  
 120 as follows:

121 
$$k_{i,t} = k_b + I_{1,t} * (1 - r_{1,i}) \quad (10)$$

122 where  $I_{1,t}$  is the intensity of stress 1 at time  $t$ ,  $r_{1,i}$  is the stress resistance provided by the genotype  $i$ .

123 Environmental fluctuations are modeled by a stochastic stress whose duration, frequency and intensity are  
 124 variable. Stress 1 is modeled as a sequence of stress-free periods (whose durations are drawn from  $\exp(f_1)$ )  
 125 and stressful periods (whose durations are drawn from  $\exp\left(\frac{1}{d_1}\right)$ ) and stress intensities are drawn from  
 126  $Unif(0,0.75)$ . We set the maximum stress intensity at 0.75 to avoid population extinctions.

127 When there are 2 stresses (AbaR and SNP confer antibiotic resistance, see Figure 4A, 4B, 4C), the lysis  
 128 rate for genotype  $i$  at time  $t$  is calculated as follows:

129 
$$k_{i,t} = k_b + I_{1,t} * (1 - r_{1,i}) + I_{2,t} * (1 - r_{2,i}) \quad (11)$$

130  $I_{1,t}, I_{2,t}$  are the intensities of stresses 1 and 2 at time  $t$  (the term  $I_{1,t} * (1 - r_{1,i}) + I_{2,t} * (1 - r_{2,i})$  is  
 131 truncated to 1 if necessary),  $r_{1,i}, r_{2,i}$  are the stress resistances of the genotype  $i$ . Stress 1 increases the lysis  
 132 rate of cells not carrying AbaRs whereas the lysis rate of cells carrying any AbaR remains at the basal rate  $k_b$ .  
 133 The lysis rate of cells carrying the SNP remains at the basal rate in presence of stress 2 and the lysis rate of

134 cells carrying both AbaR and SNP always remains at the basal rate. Stress 2 is modelled as stress 1 for its  
135 duration, frequency and intensity (see above).

136 *Fluctuating resource*

137 In the last situation modelled, the SNP confers a selective advantage when the bacterial population has  
138 access to a new resource over a given period (Figure 4D). Under this scenario, we consider two SNP: SNP<sub>0</sub> and  
139 SNP<sub>1</sub>. SNP<sub>0</sub> is advantageous in environment 0 (it does not incur replication costs) but does not allow optimal  
140 exploitation of the resource in environment 1 (increases the replication cost) and inversely for SNP<sub>1</sub>. Unlike the  
141 situation with exposure to stress 2, here, the SNPs only influence the replication parameter  $c_i$  (see equation  
142 (2)). The environmental switches are modeled as a change from environment 0 to 1, or from environment 1 to 0.

143 **Statistical analysis and figures.** All the statistical analyses and figures were produced on R4.3.1 (additional  
144 packages: ggplot2 (2), forcats (3), ggpubr (4), scales (5)).

145 **Table S1: Gene content and acquisition time of the *abaR* disrupting *comM* in strains with *abaR*-disrupted *comM***

146 *gembase*: genome identifier; *Nb.genes*: number of genes in *abaR*; *tniC*: present if yes otherwise absent; *tniA*: present if yes otherwise absent; *orf4*: present if yes  
 147 otherwise absent; *CSL*: presence of the left-end conserved sequence if yes otherwise absent, *CSR*: presence of the right-end conserved sequence if yes otherwise  
 148 absent, *ST* : sequence type; *Acquisition.node*: node at which all genes for the *abaR* were gained, *MGE/Defense system*: mobile genetic elements and defense  
 149 systems detected in the region of interruption, *AMR*: antimicrobial resistance gene detected in the region of interruption

| <i>gembase</i>  | <b>Nb<br/>genes</b> | <i>tniC</i> | <i>tniA</i> | <i>orf4</i> | <i>CSL</i> | <i>CSR</i> | <i>ST</i> | <i>Acquisition.node</i> | <i>MGE/Defense system</i> | <i>AMR</i>                                 |
|-----------------|---------------------|-------------|-------------|-------------|------------|------------|-----------|-------------------------|---------------------------|--------------------------------------------|
| ACBA.0922.00001 | 20                  | yes         | yes         | yes         | yes        | yes        | 1         | Node105                 | ISL3                      |                                            |
| ACBA.0922.00002 | 11                  | no          | yes         | yes         | no         | yes        | 437       | Node95                  | IS701                     |                                            |
| ACBA.0922.00005 | 16                  | yes         | yes         | yes         | yes        | yes        | 2         | Node417                 | IS91                      | tetracycline, aminoglycoside, streptomycin |
| ACBA.0922.00013 | 8                   | no          | no          | yes         | no         | yes        | 2         | Node417                 |                           |                                            |
| ACBA.0922.00017 | 10                  | yes         | yes         | yes         | yes        | yes        | 15        | Node62                  |                           |                                            |
| ACBA.0922.00023 | 16                  | yes         | yes         | yes         | yes        | yes        | 2         | Node417                 | IS91                      | tetracycline, aminoglycoside, streptomycin |
| ACBA.0922.00025 | 23                  | yes         | yes         | yes         | yes        | yes        | 1         | Node105                 |                           |                                            |
| ACBA.0922.00034 | 20                  | yes         | yes         | yes         | yes        | yes        | 1         | Node105                 |                           |                                            |
| ACBA.0922.00051 | 11                  | yes         | yes         | yes         | yes        | yes        | 39        | ACBA.0922.00051         |                           |                                            |
| ACBA.0922.00063 | 9                   | no          | no          | yes         | no         | yes        | 437       | Node95                  |                           |                                            |

sulfonamide, aminoglycoside, streptomycin, gentamicin, cephalosporin, phenicol, tetracycline,

|                 |    |     |     |     |     |     |     |                 |                                    |                                                       |
|-----------------|----|-----|-----|-----|-----|-----|-----|-----------------|------------------------------------|-------------------------------------------------------|
| ACBA.0922.00066 | 60 | yes | yes | yes | yes | yes | 1   | Node105         | ISL3, Integron_complete, IS6, ISL3 | chloramphenicol                                       |
| ACBA.0922.00090 | 33 | yes | yes | yes | yes | yes | 367 | ACBA.0922.00090 | ISL3                               | sulfonamide                                           |
| ACBA.0922.00115 | 10 | yes | yes | yes | yes | yes | 15  | Node62          |                                    |                                                       |
| ACBA.0922.00133 | 9  | no  | no  | yes | no  | yes | 494 | ACBA.0922.00133 |                                    |                                                       |
|                 |    |     |     |     |     |     | 122 |                 |                                    |                                                       |
| ACBA.0922.00185 | 9  | yes | yes | yes | yes | yes | 0   | ACBA.0922.00185 |                                    |                                                       |
| ACBA.0922.00200 | 13 | yes | yes | no  | yes | no  | 923 | ACBA.0922.00200 | IS5                                |                                                       |
| ACBA.0922.00212 | 15 | yes | yes | yes | yes | yes | 32  | Node11          |                                    |                                                       |
| ACBA.0922.00241 | 5  | no  | no  | yes | no  | yes | 2   | Node417         | IS91                               | aminoglycoside, streptomycin                          |
| ACBA.0922.00251 | 10 | yes | yes | yes | yes | yes | 15  | Node62          |                                    |                                                       |
| ACBA.0922.00263 | 15 | yes | yes | yes | yes | yes | 32  | Node11          |                                    |                                                       |
| ACBA.0922.00273 | 8  | yes | yes | yes | yes | yes | 2   | Node417         | IS91, NA                           | aminoglycoside, streptomycin                          |
| ACBA.0922.00289 | 20 | yes | yes | yes | yes | yes | 1   | Node105         | ISL3, ISL3                         |                                                       |
| ACBA.0922.00290 | 16 | yes | yes | yes | yes | yes | 2   | Node417         | IS91                               | aminoglycoside, tetracycline, streptomycin            |
| ACBA.0922.00295 | 10 | yes | yes | yes | yes | yes | 15  | Node62          |                                    |                                                       |
| ACBA.0922.00318 | 20 | yes | yes | yes | yes | yes | 1   | Node105         | ISL3, ISL3                         |                                                       |
| ACBA.0922.00334 | 10 | yes | yes | yes | yes | yes | 15  | Node62          |                                    |                                                       |
| ACBA.0922.00336 | 10 | yes | yes | yes | yes | yes | 15  | Node62          |                                    |                                                       |
| ACBA.0922.00338 | 10 | yes | yes | yes | yes | yes | 15  | Node62          |                                    |                                                       |
| ACBA.0922.00353 | 17 | no  | no  | yes | no  | yes | 1   | Node105         | Integron_complete                  | sulfonamide, aminoglycoside, streptomycin, gentamicin |
| ACBA.0922.00356 | 16 | yes | yes | yes | yes | yes | 2   | Node417         | IS91                               | tetracycline, aminoglycoside, streptomycin            |



|                 |    |     |     |     |     |     |     |                 |            |                                            |
|-----------------|----|-----|-----|-----|-----|-----|-----|-----------------|------------|--------------------------------------------|
| ACBA.0922.00361 | 20 | yes | yes | yes | yes | yes | 20  | Node105         | ISL3, ISL3 |                                            |
| ACBA.0922.00362 | 10 | yes | yes | yes | yes | yes | 318 | Node62          |            |                                            |
| ACBA.0922.00365 | 10 | yes | yes | yes | yes | yes | 632 | ACBA.0922.00365 |            |                                            |
| ACBA.0922.00368 | 16 | yes | yes | yes | yes | yes | 2   | Node417         | IS91, IS91 | tetracycline, aminoglycoside, streptomycin |
| ACBA.0922.00372 | 9  | no  | no  | yes | no  | yes | 2   | Node417         | IS91       | aminoglycoside, tetracycline, streptomycin |
| ACBA.0922.00381 | 20 | yes | yes | yes | yes | yes | 1   | Node105         |            |                                            |
| ACBA.0922.00386 | 10 | yes | yes | yes | yes | yes | 15  | Node62          |            |                                            |
| ACBA.0922.00387 | 5  | no  | no  | yes | no  | yes | 15  | Node62          |            |                                            |
| ACBA.0922.00388 | 7  | no  | no  | yes | no  | yes | 745 | Node417         | IS91       | tetracycline, aminoglycoside, streptomycin |
|                 |    |     |     |     |     |     | 101 |                 |            |                                            |
| ACBA.0922.00400 | 15 | yes | yes | no  | yes | no  | 7   | ACBA.0922.00400 | new, new   |                                            |
| ACBA.0922.00406 | 10 | yes | yes | yes | yes | yes | 84  | Node62          |            |                                            |
| ACBA.0922.00410 | 31 | yes | yes | yes | yes | yes | -   | ACBA.0922.00410 | IS91, IS3  | sulfonamide                                |
| ACBA.0922.00420 | 10 | yes | yes | yes | yes | yes | 103 | ACBA.0922.00420 |            |                                            |
| ACBA.0922.00421 | 16 | yes | yes | yes | yes | yes | 1   | Node105         |            |                                            |
| ACBA.0922.00428 | 16 | yes | yes | yes | yes | yes | 2   | Node417         | IS91       | tetracycline, aminoglycoside, streptomycin |
| ACBA.0922.00436 | 10 | yes | yes | yes | yes | yes | 318 | Node62          |            |                                            |
| ACBA.0922.00440 | 18 | yes | yes | yes | yes | yes | 2   | Node417         | IS91       | tetracycline, aminoglycoside, streptomycin |
| ACBA.0922.00446 | 10 | yes | yes | yes | yes | yes | 15  | Node62          |            |                                            |
| ACBA.0922.00447 | 10 | yes | yes | yes | yes | yes | 15  | Node62          |            |                                            |

|                 |    |     |     |     |     |     |     |                 |                                            |
|-----------------|----|-----|-----|-----|-----|-----|-----|-----------------|--------------------------------------------|
| ACBA.0922.00450 | 16 | yes | yes | yes | yes | yes | 1   | Node105         |                                            |
| ACBA.0922.00453 | 10 | yes | yes | yes | yes | yes | 15  | Node62          |                                            |
| ACBA.0922.00465 | 10 | yes | yes | yes | yes | yes | 318 | Node62          |                                            |
| ACBA.0922.00467 | 9  | yes | yes | no  | yes | no  | 2   | Node417         |                                            |
| ACBA.0922.00470 | 10 | yes | yes | yes | yes | yes | 15  | Node62          |                                            |
| ACBA.0922.00471 | 15 | yes | yes | yes | yes | yes | -   | Node417         | aminoglycoside, tetracycline, streptomycin |
| ACBA.0922.00475 | 16 | yes | yes | yes | yes | yes | 1   | Node105         |                                            |
| ACBA.0922.00476 | 33 | yes | yes | yes | yes | yes | 271 | ACBA.0922.00476 | sulfonamide                                |
| ACBA.0922.00479 | 16 | yes | yes | yes | yes | yes | 1   | Node105         |                                            |
| ACBA.0922.00480 | 7  | yes | yes | no  | yes | no  | 2   | Node417         |                                            |
| ACBA.0922.00482 | 10 | yes | yes | yes | yes | yes | 15  | Node62          |                                            |

150 **Table S2: Parameters used in the model.**

151 While the values of time step  $dt$  and carrying capacity  $K$  are arbitrary, the value of the eDNA input  $M_{input, j}$  is set at  $1E2$  to add on average one eDNA molecule of  
 152 each type  $j$  at each time step  $dt$ . The values of  $\mu_{max}$  and  $k_b$  are chosen so that  $\mu_{max} - k_b = \frac{2^{dt} - 1}{dt}$  to ensure that one time unit corresponds to one generation of AbaR-  
 153 free cells and in the absence of density dependence and stress exposure. Finally the rate of eDNA degradation  $Dg_j$  is set at 0.16 so that the amount of extracellular  
 154 eDNA is divided by  $1E5$  in 24h as documented in (6) (i.e. 72 generations using the approximation that the generation time is 20 minutes).

| Parameter      | Description                                 | Value(s)         | Unit                       |
|----------------|---------------------------------------------|------------------|----------------------------|
| $dt$           | Time step                                   | 0.01             | Unitless                   |
| $\mu_{max}$    | Maximal growth rate                         | 0.795555         | GT <sup>-1</sup>           |
| $k_b$          | Constant basal lysis rate                   | 0.1              | GT <sup>-1</sup>           |
| $c$            | Cost of SNP                                 | 0.01 or 0.1      | Unitless                   |
| $K$            | Carrying capacity                           | 1E7              | cells                      |
| $T_{max, i}$   | Maximal transformation rate of genotype $i$ | 1E-3 or 0        | GT <sup>-1</sup>           |
| $Dg_j$         | eDNA degradation rate                       | 0.16 $\forall j$ | GT <sup>-1</sup>           |
| $M_{input, j}$ | eDNA molecules input                        | 1E2 $\forall j$  | molecules.GT <sup>-1</sup> |

155 **Table S3: Genotypes of the 3 sites model (*comM*, *pilT*, *pho*)**

- 156 List of the 8 bacterial genotypes of the 3 sites model, with their simplified name, numbering (used in the  
 157 transition matrix S5), complete genotype, maximal transformation rate (effective transformation rate depend on  
 158 bacterial genotype and eDNA types and are listed in Table S5), as well as resistance and replication phenotypes.  
 159 List of the 6 types of extracellular DNA molecules with their numbering.

| Name               | Number      | Genotype           |             |                    | Phenotype                               |                   | Cost $c_i$ |
|--------------------|-------------|--------------------|-------------|--------------------|-----------------------------------------|-------------------|------------|
|                    |             | <i>comM</i>        | <i>pilT</i> | <i>pho</i>         | Maximal transformation rate $T_{max,i}$ | Resistance        |            |
| AbaR-free          | 0           | WT                 | WT          | WT                 | 1E-3                                    | No                | 0          |
| <i>pho</i> ::AbaR  | 1           |                    |             | AbaR               | 1E-3                                    | Yes               | 0.01       |
| <i>pilT</i> ::AbaR | 2           |                    | AbaR        |                    | 0                                       | Yes               | 0.01       |
| <i>comM</i> ::AbaR | 4           | AbaR               |             |                    | 1E-3                                    | Yes               | 0.01       |
| AbaR-multi         | 3           |                    | AbaR        | AbaR               | 0                                       | Yes               | 2*0.01     |
|                    | 5           | AbaR               |             | AbaR               | 1E-3                                    | Yes               | 2*0.01     |
|                    | 6           | AbaR               | AbaR        |                    | 0                                       | Yes               | 2*0.01     |
|                    | 7           | AbaR               | AbaR        | AbaR               | 0                                       | Yes               | 3*0.01     |
|                    |             |                    |             |                    |                                         |                   |            |
| Number             | 0           | 1                  | 2           | 3                  | 4                                       | 5                 |            |
| eDNA molecule      | <i>comM</i> | <i>comM</i> ::AbaR | <i>pilT</i> | <i>pilT</i> ::AbaR | <i>pho</i>                              | <i>pho</i> ::AbaR |            |

160 **Table S4: Genotypes of the 4 sites model (*comM*, *pilT*, *pho*, SNP)**

161 List of the 16 bacterial genotypes of the 4 sites model, with their simplified name, numbering (used in the  
 162 transition matrix  $S_5$ ), complete genotype, maximal transformation rate, as well as resistance and replication  
 163 phenotypes.

164 List of the 8 types of extracellular DNA molecules with their numbering.

| Name                               | #    | Genotype   |      |            |     | Maximal transformation rate $T_{max,i}$ | Resistances |          | Cost $c_i$ |
|------------------------------------|------|------------|------|------------|-----|-----------------------------------------|-------------|----------|------------|
|                                    |      | comM       | pilT | pho        | SNP |                                         | Stress 1    | Stress 2 |            |
| AbaR-free                          | 0    | WT         | WT   | WT         | 0   | 1E-3                                    | No          | No       | 0          |
| AbaR-free+SNP                      | 1    | WT         | WT   | WT         | 1   | 1E-3                                    | No          | Yes      | c          |
| pho::AbaR                          | 2    |            |      | AbaR       | 0   | 1E-3                                    | Yes         | No       | 0.01       |
| pho::AbaR+SNP                      | 3    |            |      | AbaR       | 1   | 1E-3                                    | Yes         | Yes      | 0.01+c     |
| pilT::AbaR                         | 4    |            | AbaR |            | 0   | 0                                       | Yes         | No       | 0.01       |
| pilT::AbaR+SNP                     | 5    |            | AbaR |            | 1   | 0                                       | Yes         | Yes      | 0.01+c     |
| AbaR-multi                         | 6    |            | AbaR | AbaR       | 0   | 0                                       | Yes         | No       | 2*0.01     |
| AbaR-multi+SNP                     | 7    |            | AbaR | AbaR       | 1   | 0                                       | Yes         | Yes      | 2*0.01+c   |
| comM::AbaR                         | 8    | AbaR       |      |            | 0   | 1E-3                                    | Yes         | No       | 0.01       |
| comM::AbaR+SNP                     | 9    | AbaR       |      |            | 1   | 1E-3                                    | Yes         | Yes      | 0.01+c     |
| AbaR-multi                         | 10   | AbaR       |      | AbaR       | 0   | 1E-3                                    | Yes         | No       | 2*0.01     |
| AbaR-multi+SNP                     | 11   | AbaR       |      | AbaR       | 1   | 1E-3                                    | Yes         | Yes      | 2*0.01+c   |
| AbaR-multi                         | 12   | AbaR       | AbaR |            | 0   | 0                                       | Yes         | No       | 2*0.01     |
| AbaR-multi+SNP                     | 13   | AbaR       | AbaR |            | 1   | 0                                       | Yes         | Yes      | 2*0.01+c   |
| AbaR-multi                         | 14   | AbaR       | AbaR | AbaR       | 0   | 0                                       | Yes         | No       | 3*0.01     |
| AbaR-multi+SNP                     | 15   | AbaR       | AbaR | AbaR       | 1   | 0                                       | Yes         | Yes      | 3*0.01+c   |
| <b>eDNA molecules nomenclature</b> |      |            |      |            |     |                                         |             |          |            |
| Number                             | 0    | 1          | 2    | 3          | 4   | 5                                       | 6           | 7        |            |
| eDNA molecule                      | comM | comM::AbaR | pilT | pilT::AbaR | pho | pho::AbaR                               | SNP0        | SNP1     |            |

165 **Table S5: Transformation event probabilities used in the model.**

166 The probability of success of the transformation undertaken is equal to 1 when (i) the transformation is not  
 167 inhibited (i.e. when the cell involved in the transformation is of WT or  $\Delta pho$  genotype) and (ii) the cell acquires a  
 168 short allele (WT or SNP). In other situations, the probability of a successful transformation is lower, either  
 169 because of the high length of the acquired allele (AbaR acquisition), or because the *comM* or *pilT* gene is no  
 170 longer functional ( $\Delta comM$  or  $\Delta pho$ ). The probability of a successful transformation is then calculated as the ratio  
 171 of the probabilities drawn at random from the normal distributions (mean and SE) obtained from the log-  
 172 transformed frequencies of the experiments (Figure 2). The 'reference' probability (an estimate of the probability  
 173 of transformation without inhibition and corresponding to the acquisition of a short sequence) P1 and P5, differs  
 174 according to experimental design 1 or 2, respectively. The distributions of the relative probabilities (mean and SD  
 175 for 1000 draws) are given for information.

| Experimental design                                                   | Event                                      | Random draw of log-transformed probabilities | Transformation exp                      | Relative probability        | Relative probability distributions (mean $\pm$ sd) |
|-----------------------------------------------------------------------|--------------------------------------------|----------------------------------------------|-----------------------------------------|-----------------------------|----------------------------------------------------|
| Experimental design 1 (model of gene transfer, Figure 2B)             | Deletion of AbaR by WT cells               | $P_1 \sim N(-8.415965, 0.26905)$             | $Q_1 = \frac{\exp(P_1)}{1 + \exp(P_1)}$ | $R_1 = \frac{Q_1}{Q_1} = 1$ |                                                    |
|                                                                       | Acquisition of AbaR by WT cells            | $P_2 \sim N(-9.840681, 0.15379)$             | $Q_2 = \frac{\exp(P_2)}{1 + \exp(P_2)}$ | $R_2 = \frac{Q_2}{Q_1}$     | 2.57E-1<br>$\pm 8.28E-2$                           |
|                                                                       | Deletion of AbaR by $\Delta comM$ cells    | $P_3 \sim N(-14.19787, 0.29826)$             | $Q_3 = \frac{\exp(P_3)}{1 + \exp(P_3)}$ | $R_3 = \frac{Q_3}{Q_1}$     | 3.34E-3<br>$\pm 1.41E-3$                           |
|                                                                       | Acquisition of AbaR by $\Delta comM$ cells | $P_4 \sim N(-16.39911, 0.23570)$             | $Q_4 = \frac{\exp(P_4)}{1 + \exp(P_4)}$ | $R_4 = \frac{Q_4}{Q_1}$     | 3.72E-4<br>$\pm 1.37E-4$                           |
| Experimental design 2 (model of gene and allelic transfer, Figure 2C) | Acquisition of SNP by WT cells             | $P_5 \sim N(-11.75745, 0.34040)$             | $Q_5 = \frac{\exp(P_5)}{1 + \exp(P_5)}$ | $R_5 = \frac{Q_5}{Q_5} = 1$ |                                                    |
|                                                                       | Acquisition of SNP by $\Delta comM$ cells  | $P_6 \sim N(-13.70786, 0.21012)$             | $Q_6 = \frac{\exp(P_6)}{1 + \exp(P_6)}$ | $R_5 = \frac{Q_6}{Q_5}$     | 2.04E-1<br>$\pm 6.04E-2$                           |



181 **Table S7: Bacterial strains and plasmids used in this study**

| Name/Genotype                                                                                              | Source                    | Comments                                                                                     |
|------------------------------------------------------------------------------------------------------------|---------------------------|----------------------------------------------------------------------------------------------|
| <b>strains used for the measure of acquisition of a single nucleotide polymorphism</b>                     |                           |                                                                                              |
| M2 WT                                                                                                      | (7)                       | <i>A. nosocomialis</i> M2 Wild-type strain                                                   |
| M2 <i>comM::[sacB aacC4]</i>                                                                               | This study                | Sucrose sensitive and apramycin resistant                                                    |
| M2 $\Delta$ <i>comM</i>                                                                                    | This study                | Deletion into the <i>comM</i> gene                                                           |
| M2 <i>pho::[sacB aacC4]</i>                                                                                | This study                | Sucrose sensitive and apramycin resistant                                                    |
| M2 $\Delta$ <i>pho</i>                                                                                     | This study                | Deletion into the <i>pho</i> gene                                                            |
| M2 <i>attn7::[lacZ aphA]</i>                                                                               | This study                | Natural transformation with assembly PCR                                                     |
| M2 $\Delta$ <i>comM</i> <i>attn7::[lacZ aphA]</i>                                                          | This study                | Kanamycin resistant                                                                          |
| M2 $\Delta$ <i>pho</i> <i>attn7::[lacZ aphA]</i>                                                           | This study                | Kanamycin resistant                                                                          |
| M2 <i>pilT::km</i>                                                                                         | (8)                       | Not naturally transformable ; Kanamycin resistant                                            |
| M2 <i>rpoB</i> (Rif <sup>R</sup> )                                                                         | This study                | Spontaneous mutation in <i>rpoB</i> gene ; Rifampicin resistant                              |
| M2 <i>rpoB</i> (Rif <sup>R</sup> ) <i>comEC::aacC4</i>                                                     | This study                | Rifampicin resistant, apramycin resistant                                                    |
| <b>Strains used for bacterial competitions</b>                                                             |                           |                                                                                              |
| M2 <i>hu-sfgfp aacC4</i>                                                                                   | (9)                       | Fluorescent ; apramycin resistant                                                            |
| M2 <i>comM::[AbaR4]</i>                                                                                    | This study                | Natural transformation with genomic DNA from <i>A. baumannii</i> 40288 strain                |
| M2 <i>comM::[AbaR1]</i>                                                                                    | This study                | Natural transformation with genomic DNA from <i>A. baumannii</i> AYE strain                  |
| AYE WT                                                                                                     | (10)                      | <i>A. baumannii</i> AYE Wild-type strain                                                     |
| M2 <i>comM::[AbaR4] hu-sfgfp aacC4</i>                                                                     | This study                | Fluorescent ; apramycin resistant                                                            |
| M2 <i>comM::[AbaR1] hu-sfgfp aacC4</i>                                                                     | This study                | Fluorescent ; apramycin resistant                                                            |
| M2 $\Delta$ <i>comM hu-sfgfp aacC4</i>                                                                     | This study                | Fluorescent ; apramycin resistant                                                            |
| <b>Strains used for the measure of acquisition and deletion of the L fragment</b>                          |                           |                                                                                              |
| M2 <i>pho::[AbaR4]</i>                                                                                     | This study                | Natural transformation with genomic DNA from <i>A. baumannii</i> AB0057 strain               |
| M2 <i>comM::[sacB aacC4] pho::[AbaR4]</i>                                                                  | This study                | Sucrose sensitive and apramycin resistant                                                    |
| M2 $\Delta$ <i>comM pho::[AbaR4]</i>                                                                       | This study                | Deletion into the <i>comM</i> gene                                                           |
| M2 $\Delta$ <i>comM pho::[AbaR4 sacB aacC4]</i>                                                            | This study                | Intermediate genotype                                                                        |
| M2 $\Delta$ <i>comM pho::[AbaR4 <math>\Delta</math>'aacC4]</i>                                             | This study                | Intermediate genotype                                                                        |
| M2 $\Delta$ <i>comM pho::[AbaR4 tniA::(sacB aacC4) <math>\Delta</math>'aacC4]</i>                          | This study                | Intermediate genotype                                                                        |
| M2 $\Delta$ <i>comM pho::[AbaR4 tniA1(Oc) <math>\Delta</math>'aacC4]</i>                                   | This study                | Intermediate genotype                                                                        |
| M2 $\Delta$ <i>comM pho::[AbaR4 tniA1(Oc) aacC4::(aphA Lj)]</i>                                            | This study                | Intermediate genotype                                                                        |
| M2 <i>rpoB</i> (Rif <sup>R</sup> ) $\Delta$ <i>comM pho::[AbaR4 tniA1(Oc) aacC4::(aphA Lj)]</i>            | This study                | Recipient strain for deletion ; deletion into the <i>comM</i> gene ; Rifampicin resistant    |
| M2 <i>comEC::tetA <math>\Delta</math>comM pho::[AbaR4 tniA1(Oc) aacC4::(aphA Lj)]</i>                      | This study                | Donor strain for acquisition ; not naturally transformable                                   |
| M2 $\Delta$ <i>comM pho::[AbaR4 tniA1(Oc) aacC4 <math>\Delta</math>Lj]</i>                                 | This study                | Intermediate genotype                                                                        |
| M2 <i>rpoB</i> (Rif <sup>R</sup> ) $\Delta$ <i>comM pho::[AbaR4 tniA1(Oc) aacC4 <math>\Delta</math>Lj]</i> | This study                | Recipient strain for acquisition ; deletion into the <i>comM</i> gene ; Rifampicin resistant |
| M2 <i>comEC::tetA <math>\Delta</math>comM pho::[AbaR4 tniA1(Oc) aacC4 <math>\Delta</math>Lj]</i>           | This study                | Donor strain for deletion ; not naturally transformable                                      |
| M2 <i>pho::[AbaR tniA1(Oc) aacC4::(aphA L)]</i>                                                            | This study                | Intermediate genotype                                                                        |
| M2 <i>rpoB</i> (Rif <sup>R</sup> ) <i>comM</i> * <i>pho::[AbaR4 tniA1(Oc) aacC4::(aphA Lj)]</i>            | This study                | Recipient strain for deletion ; rifampicin resistant                                         |
| M2 <i>comM</i> * <i>pho::[AbaR4 tniA1(Oc) aacC4 <math>\Delta</math>Lj]</i>                                 | This study                | Intermediate genotype                                                                        |
| M2 <i>rpoB</i> (Rif <sup>R</sup> ) <i>comM</i> * <i>pho::[AbaR4 tniA1(Oc) aacC4 <math>\Delta</math>Lj]</i> | This study                | Recipient strain for acquisition ; Rifampicin resistant                                      |
| <b>Plasmids</b>                                                                                            |                           |                                                                                              |
| pASG-4                                                                                                     | (9)                       | Not replicative in <i>Acinetobacter</i>                                                      |
| pMHL-7                                                                                                     |                           | Contains the [ <i>sacB aacC4</i> ] cassette                                                  |
| pMHL-2                                                                                                     | (9)                       | Contains the <i>aacC4</i> gene                                                               |
| pXDC116                                                                                                    | Derivative of pXDC61 (11) | Contains the Kan <sup>R</sup> cassette                                                       |



182 **Table S8: Primers used in this study**

| Primer name | Sequence 5' to 3'                                  | Template ; annealing site                            | Use (genetic construct)                                                                                                        |
|-------------|----------------------------------------------------|------------------------------------------------------|--------------------------------------------------------------------------------------------------------------------------------|
| mlo-104     | AAGATATCGGCTCTCCAAGC                               | M2 genomic DNA ; <i>rpoB</i> gene                    | <i>rpoB</i> (Rif <sup>R</sup> )                                                                                                |
| mlo-105     | AGTACGGCCTTCGTCAT                                  | M2 genomic DNA ; <i>rpoB</i> gene                    | <i>rpoB</i> (Rif <sup>R</sup> )                                                                                                |
| mlo-97      | ATACCGCCGTAGAATGCC                                 | M2 genomic DNA ; 2-kbp Upstream <i>comM</i> gene     | $\Delta comM$                                                                                                                  |
| comM-Rev    | TTAAGAGTGATTACCTCGATAAGA                           | M2 genomic DNA ; 3' of the <i>comM</i> gene          | $\Delta comM$                                                                                                                  |
| asg-100     | AATTTCCAGTGCCAGCAGC                                | M2 genomic DNA ; <i>comM</i> gene                    | $\Delta comM$                                                                                                                  |
| asg-76      | CGGCGTGCCTAGAAATCCACGGGTGAAATTAC                   | M2 genomic DNA ; <i>comM</i> gene                    | $\Delta comM$                                                                                                                  |
| Apra-For    | ATCAAGGCCCGATCCTTGGAGCCCTTG                        | pMHL-2; Beginning of <i>aacC4</i> gene               | [ <i>aacC4</i> $\Delta$ L] ; <i>aacC4::aphA</i>                                                                                |
| mlo-29      | TCATGAGCTCAGCCAATCGACTGG                           | pMHL-2; End of Apra <sup>R</sup> cassette            | [ <i>aacC4</i> $\Delta$ L] ; [ <i>sacB aacC4</i> ] ; [AbaR4 <i>aacC4::(aphA L)</i> ] (L=2, 4-kbp)                              |
| asg-58      | ATCACCCATCACATATACCTGCCG                           | pMHL-2 ; Upstream <i>sacB</i> gene                   | [ <i>sacB aacC4</i> ]                                                                                                          |
| asg-85      | ACCCGTGATTTACGCTAG                                 | M2 genomic DNA ; 2-kbp Upstream <i>pho</i> gene      | <i>pho::[sacB aacC4]</i> ; <i>pho::[AbaR4 sacB aacC4]</i> ; $\Delta pho$                                                       |
| asg-86      | CGGCAGGTATATGTGATGGGTGATTACGACGGCTCACATATTGGTC     | M2 genomic DNA ; <i>pho</i> gene                     | <i>pho::[sacB aacC4]</i> ; <i>pho::[AbaR4 sacB aacC4]</i> ; $\Delta pho$                                                       |
| asg-87      | CCAGTTCGATTGGCTGAGCTCATGACTAAAGCAAGCGGTG           | M2 genomic DNA ; <i>pho</i> gene                     | <i>pho::[sacB aacC4]</i>                                                                                                       |
| asg-88      | AACCAGCAATAACACC                                   | M2 genomic DNA ; 2-kbp Downstream <i>pho</i> gene    | <i>pho::[sacB aacC4]</i> ; <i>pho::[AbaR4 sacB aacC4]</i> ; $\Delta pho$ ; <i>pho::[AbaR4 <math>\Delta</math>'aacC4]</i>       |
| asg-97      | ATCACCCATCACATATACCTGCCGTTGGGACGCAATTGG            | M2 genomic DNA ; <i>pho</i> gene                     | $\Delta pho$                                                                                                                   |
| asg-108     | TTCAGTTGTCTCAAAGGACGC                              | AbaR4 island                                         | <i>pho::[AbaR4 sacB aacC4]</i> ; <i>pho::[AbaR4 <math>\Delta</math>'aacC4]</i> ; [AbaR4 <i>aacC4::(aphA L)</i> ] (L=2, 10-kbp) |
| asg-137     | CGGCAGGTATATGTGATGGGTGATGTCAGTTCCACAAATAAA TCAGAGT | M2 genomic DNA ; Beginning of 3'half <i>pho</i> gene | <i>pho::[AbaR4 sacB aacC4]</i>                                                                                                 |
| asg-77b     | GTCAGTTCCACAAATAATCAGAGT                           | M2 genomic DNA ; Beginning of 3'half <i>pho</i> gene | <i>pho::[AbaR4 <math>\Delta</math>'aacC4]</i>                                                                                  |
| asg-138     | ACTCTGATTTATTTGTGGTGACTCATGCCCTCGTGGTCAG           | pMHL-2 ; <i>aacC4</i> gene                           | <i>pho::[AbaR4 <math>\Delta</math>'aacC4]</i>                                                                                  |
| mlo-74      | TGACAGAGCTGACGCC                                   | M2 genomic DNA ; Beginning of <i>pho</i> gene        | <i>tniA::[sacB aacC4]</i> ; <i>tniA1(Oc)</i>                                                                                   |
| asg-159     | GACCACATTGGGTTATAGAATGATACGACTA                    | AbaR4 island ; <i>tniA</i> gene                      | <i>tniA1(Oc)</i>                                                                                                               |
| asg-160     | TAGTCGTATCATTCTATCCAATGTGGTTGTC                    | AbaR4 island ; <i>tniA</i> gene                      | <i>tniA1(Oc)</i>                                                                                                               |
| asg-161     | CGGCAGGTATATGTGATGGGTGATTATTGACAGCATTAGATT C       | AbaR4 island ; <i>tniA</i> gene                      | <i>tniA::[sacB aacC4]</i>                                                                                                      |
| asg-162     | CCAGTTCGATTGGCTGAGCTCATGATAGGGCGAATGAATATG ATGTG   | AbaR4 island ; <i>tniA</i> gene                      | <i>tniA::[sacB aacC4]</i>                                                                                                      |
| R18         | TGAGAGACGCTACTC                                    | AbaR4 island                                         | <i>tniA::[sacB aacC4]</i> ; <i>tniA1(Oc)</i>                                                                                   |
| comEC-For   | TGGTTCGCTGTACTAATTACGGT                            | M2 genomic DNA ; <i>comEC</i> gene                   | <i>comEC::aacC4</i>                                                                                                            |
| asg-67      | GGGTTGAGATATACTCGCG                                | M2 genomic DNA ; 2-kb upstream <i>comEC</i> gene     | <i>comEC::tetA</i>                                                                                                             |
| comEC-Rev   | CTTCAGTTCACGCATCAAGCTTGT                           | M2 genomic DNA ; <i>comEC</i> gene                   | <i>comEC::aacC4</i> ; <i>comEC::tetA</i>                                                                                       |
| asg-168b    | GGAAGTATCAGAATTGGTTAATCAATGATATGTTGCTCAG           | M2 genomic DNA ; <i>comEC</i> gene                   | <i>comEC::tetA</i>                                                                                                             |
| asg-169     | CATATAATAATAAGTTTATTTTTCAAAAAGGCTCAATATAC TG       | M2 genomic DNA ; <i>comEC</i> gene                   | <i>comEC::tetA</i>                                                                                                             |
| asg-148     | GACTTGAGGCGCAGCGTCGTCACAGCCTGACC                   | pMHL-2 ; <i>aacC4</i> gene                           | <i>aacC4::aphA</i>                                                                                                             |
| kan-F       | CTGCGCTCAAGTGTTTC                                  | pXDC116 ; Kan <sup>R</sup> cassette                  | <i>aacC4::aphA</i>                                                                                                             |
| kan-R       | TGCCTCGTGAAGAAGG                                   | pXDC116 ; Kan <sup>R</sup> cassette                  | <i>aacC4::aphA</i>                                                                                                             |
| R3          | CAAGGGCTCCAAGGATCGGGCCTTGATTTACCATATGTGC           | AbaR4 island                                         | [AbaR4 <i>aacC4::(aphA L)</i> ] (L=2-kbp)                                                                                      |
| F4.2        | CCTTCTTCACGAGGCATTAAGGCAAGATTAGC                   | AbaR4 island                                         | [AbaR4 <i>aacC4::(aphA L)</i> ] (L=2-kbp)                                                                                      |
| oxa23-Rev   | ATTTCTGACCGCATTTCCAT                               | <i>bla</i> <sub>oxa-23</sub> gene                    | [AbaR4 <i>aacC4::(aphA L)</i> ] (L=4-kbp)                                                                                      |
| R5          | CAAGGGCTCCAAGGATCGGGCCTTGATTTTCGAGAATGG            | AbaR4 island                                         | [AbaR4 <i>aacC4::(aphA L)</i> ] (L=4-kbp)                                                                                      |
| F6.2        | CCTTCTTCACGAGGCTAGACAGTGATGAG                      | AbaR4 island                                         | [AbaR4 <i>aacC4::(aphA L)</i> ] (L=4-kbp)                                                                                      |
| F7          | TTTGAGACTGAATAAGG                                  | AbaR4 island                                         | [AbaR4 <i>aacC4::(aphA L)</i> ] (L=6-kbp)                                                                                      |
| R7          | CAAGGGCTCCAAGGATCGGGCCTTGATAGATCATCGCAGTA GAC      | AbaR4 island                                         | [AbaR4 <i>aacC4::(aphA L)</i> ] (L=6-kbp)                                                                                      |
| F8.2        | CCTTCTTCACGAGGCAAGTTCATTGTCTACTGCG                 | AbaR4 island                                         | [AbaR4 <i>aacC4::(aphA L)</i> ] (L=6-kbp)                                                                                      |

|         |                                                   |                                   |                                                |
|---------|---------------------------------------------------|-----------------------------------|------------------------------------------------|
| asg-107 | TCTTTCGTATCTGAATTTCCACG                           | AbaR4 island                      | [AbaR4 aacC4::( <i>aphA L</i> )]<br>(L=6-kbp)  |
| asg-84  | CATTCCAATAAGTTCGACTTCTG                           | AbaR4 island                      | [AbaR4 aacC4::( <i>aphA L</i> )]<br>(L=8-kbp)  |
| R9      | CAAGGGCTCCAAGGATCGGGCCTTGATTGTTACTTGGGTG          | AbaR4 island                      | [AbaR4 aacC4::( <i>aphA L</i> )]<br>(L=8-kbp)  |
| F10.2   | CCTTCTTCACGAGGCAAGTACCAGAAGC                      | AbaR4 island                      | [AbaR4 aacC4::( <i>aphA L</i> )]<br>(L=8-kbp)  |
| oxa23-D | CAGTGCTTTTAGTTGTTGTGA                             | <i>bla</i> <sub>oxa-23</sub> gene | [AbaR4 aacC4::( <i>aphA L</i> )]<br>(L=8-kbp)  |
| F11     | AAAGCGTATCTTGCTG                                  | AbaR4 island                      | [AbaR4 aacC4::( <i>aphA L</i> )]<br>(L=10-kbp) |
| R11     | CAAGGGCTCCAAGGATCGGGCCTTGATTGCCATGGCAGT<br>G      | AbaR4 island                      | [AbaR4 aacC4::( <i>aphA L</i> )]<br>(L=10-kbp) |
| F12.2   | CCTTCTTCACGAGGCAAAGTCCATGGCG                      | AbaR4 island                      | [AbaR4 aacC4::( <i>aphA L</i> )]<br>(L=10-kbp) |
| F13     | TTTCTCAGATACAGCC                                  | AbaR4 island                      | [AbaR4 aacC4::( <i>aphA L</i> )]<br>(L=12-kbp) |
| R13     | CAAGGGCTCCAAGGATCGGGCCTTGATAAGCACCGTAATTC<br>TC   | AbaR4 island                      | [AbaR4 aacC4::( <i>aphA L</i> )]<br>(L=12-kbp) |
| F14.2   | CCTTCTTCACGAGGCAATGAGAATTACGGTGC                  | AbaR4 island                      | [AbaR4 aacC4::( <i>aphA L</i> )]<br>(L=12-kbp) |
| asg-79  | AGAAGTCGTTATTGG                                   | AbaR4 island                      | [AbaR4 aacC4::( <i>aphA L</i> )]<br>(L=12-kbp) |
| mlo-111 | CACTAGAAGCGCCAAGTACGA                             | AbaR4 island                      | [AbaR4 aacC4::( <i>aphA L</i> )]<br>(L=14-kbp) |
| R15     | CAAGGGCTCCAAGGATCGGGCCTTGATATCTGAGAGACGC          | AbaR4 island                      | [AbaR4 aacC4::( <i>aphA L</i> )]<br>(L=14-kbp) |
| F16.2   | CCTTCTTCACGAGGCATTTCTCAGATACAGCC                  | AbaR4 island                      | [AbaR4 aacC4::( <i>aphA L</i> )]<br>(L=14-kbp) |
| R16     | ATGGAAGCACCGTAATTC                                | AbaR4 island                      | [AbaR4 aacC4::( <i>aphA L</i> )]<br>(L=14-kbp) |
| F17     | TGTCATTACAGCAATAGAATAGAG                          | AbaR4 island                      | [AbaR4 aacC4::( <i>aphA L</i> )]<br>(L=16-kbp) |
| R17     | CAAGGGCTCCAAGGATCGGGCCTTGATACAAGCTTTACTGA<br>TGTG | AbaR4 island                      | [AbaR4 aacC4::( <i>aphA L</i> )]<br>(L=16-kbp) |
| F18.2   | CCTTCTTCACGAGGCAATCAGTAAAGCTTGTC                  | AbaR4 island                      | [AbaR4 aacC4::( <i>aphA L</i> )]<br>(L=16-kbp) |
| R18     | TGAGAGACGCTACTC                                   | AbaR4 island                      | [AbaR4 aacC4::( <i>aphA L</i> )]<br>(L=16-kbp) |

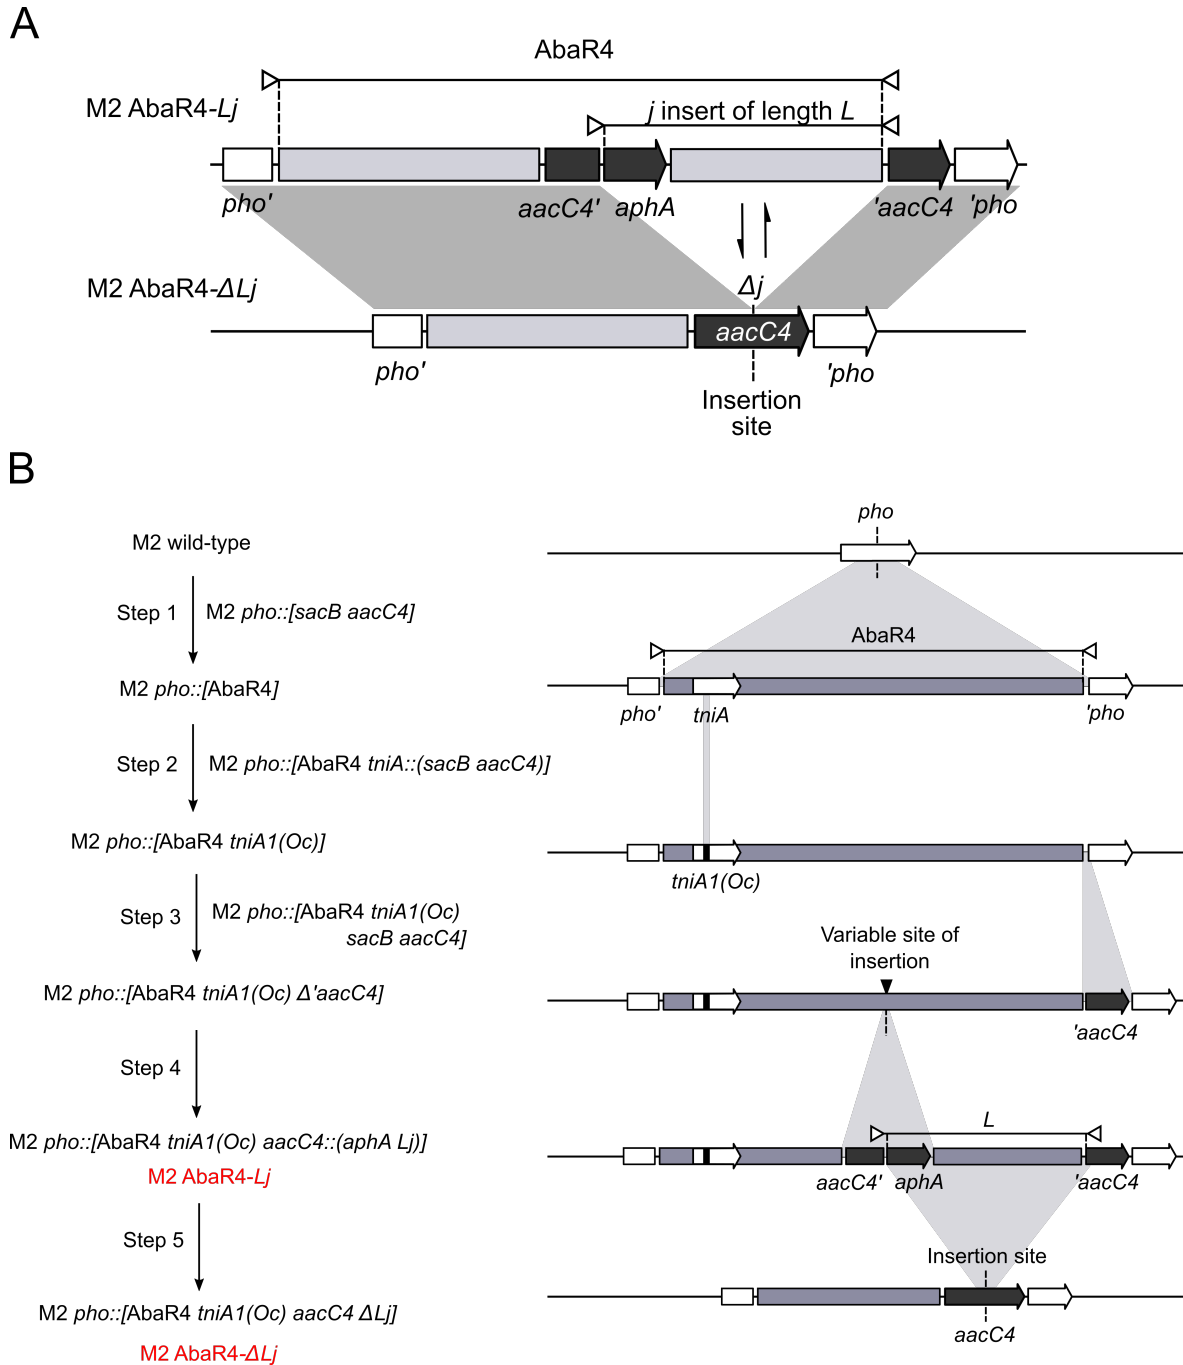

**Figure S1. Strategy and mutant construction to quantify events of acquisition or deletion of a heterologous DNA fragment occurring within mixed populations.**

**A. Genotypes of the M2 AbaR4-Lj/ΔLj couples used to quantify events of acquisition or deletion.** In the M2 AbaR4-Lj genotype, the *j* insert of length *L* is part of an AbaR4 inserted in the *pho* gene, is delimited by the two halves of an *aacC4* apramycin resistance gene (*aacC4'* and '*aacC4*') and contains an *aphA* aminoglycoside resistance gene inserted directly downstream the 3' half of *aacC4*. In the M2 AbaR4-ΔLj genotype, the *j* fragment has been removed to reconstruct the *aacC4* gene. The acquisition of *j* induces the expression of the *aphA* gene and the interruption of the *aacC4* gene leading to a kanamycin resistant/apramycin sensitive phenotype, whereas its deletion induces the reconstruction of an intact *aacC4* gene and the elimination of the *aphA* gene

leading to a kanamycin sensitive/apramycin resistant phenotype.

**B. Chromosomal modifications used to generate the genotypes carrying the *j* fragment with a variable length.** The *A. nosocomialis* M2 wild-type strain was modified to insert a large AbaR4 island into the *pho* gene (**step 1**). This was achieved by transforming the M2 *pho::[sacB aacC4]* intermediate with purified genomic DNA extracted from the *A. baumannii* AB0057 strain which naturally carries the AbaR4 island inserted into its *pho* gene. To avoid any transposition of the AbaR4 island, a point mutation leading to the generation of a stop codon and a change into the open reading frame was inserted into the coding sequence of the *tniA* gene of the AbaR4, generating the M2 *pho::[AbaR4 tniA1(Oc)]* strain (**step 2**). The M2 *pho::[AbaR4 tniA1(Oc) Δ'aacC4]* strain was then obtained by transforming the M2 *pho::[AbaR4 tniA1(Oc) sacB aacC4]* intermediate with the 3'half of the *aacC4* gene resulting to its insertion between the end of the AbaR4 and the 3'half of the *pho* gene (**step 3**). This parental strain was then transformed with different genetic constructs composed of the 5'half of the *aacC4* gene and a kanamycin resistance gene (*aphA*) flanked by 2-kbp regions that are homologous to different insertion sites of the AbaR4. It generated 8 different M2 *pho::[AbaR4 tniA1(Oc) aacC4::(aphA Lj)]* genotypes in which an heterologous DNA fragment labelled *j*, had a variable *L* length of 2, 4, 6, 8, 10, 12, 14 and 16-kbp (**step 4**). Finally, each of these genotypes, renamed M2 AbaR-*Lj*, were transformed with a PCR product of the *aacC4* gene to remove the *j* fragment and reconstruct the intact *aacC4* gene (**step 5**). The resulting M2 *pho::[AbaR4 tniA1(Oc) aacC4 ΔLj]* genotypes were renamed M2 AbaR4-Δ*Lj*. The Δ*comM* derivatives were obtained by transforming the M2 Δ*comM* strain with genomic DNA extracted from the different M2 AbaR4-*Lj* and M2 AbaR4-Δ*Lj* strains.

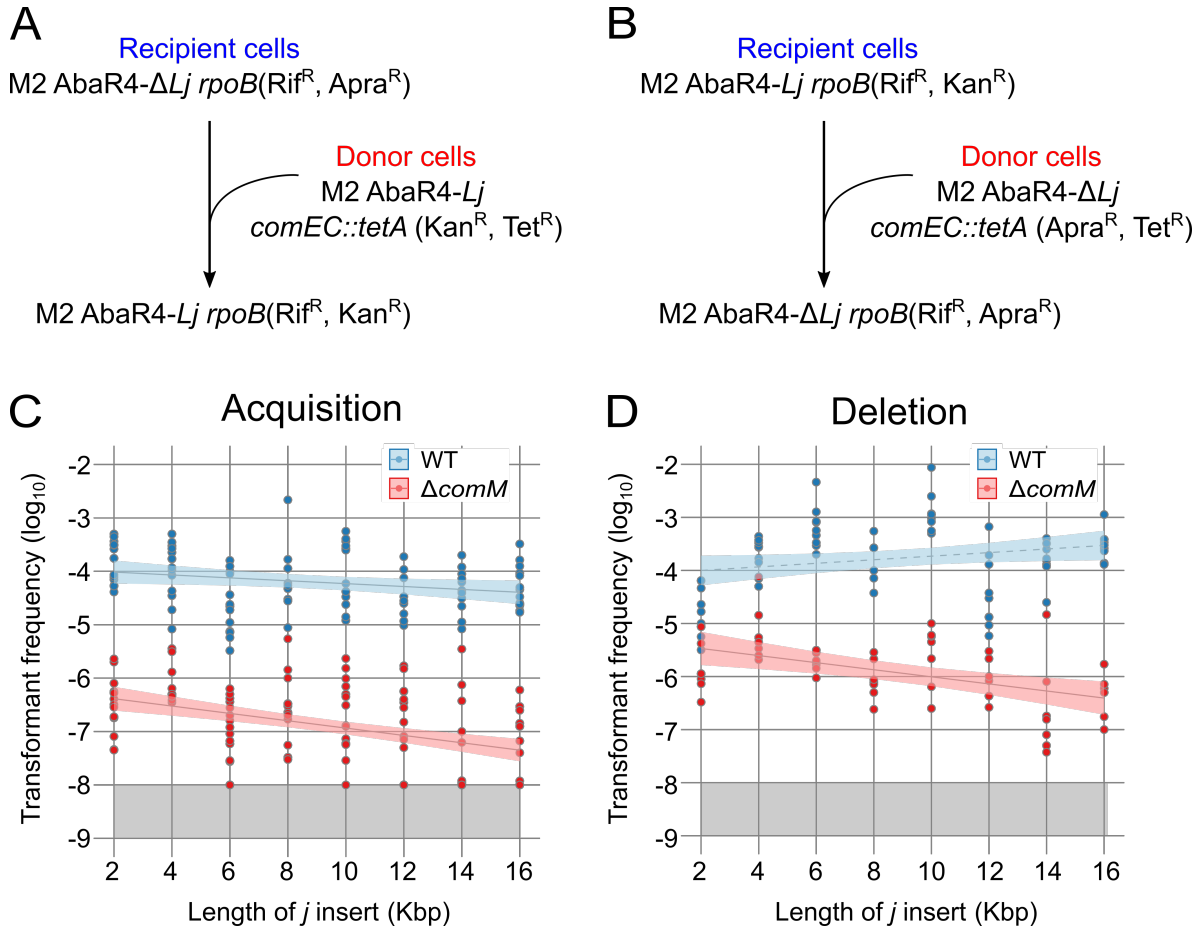

**Figure S2. Quantification of rates gene transfer (acquisition and deletion), as a function of sequence length, occurring within populations.**

A. and B. Genotypes of derivatives used as recipient or donor to generate the acquisition and the deletion of the *j* fragment. Acquisition events were obtained by naturally transforming M2 *AbaR4-ΔLj rpoB2*(Rif<sup>R</sup>) recipient cells with non-transformable M2 *AbaR4-Lj comEC::tetA* and deletion events were obtained by naturally transforming M2 *AbaR4-Lj rpoB2*(Rif<sup>R</sup>) recipient cells with non-transformable M2 *AbaR4-ΔLj comEC::tetA*. Natural transformation frequencies of acquisition (C) or deletion (D) of a heterologous *j* fragment with variable length in mixed culture. Transformant frequencies are represented using a log transformation of the ratio of the number of transformants to the number of total recipient cells. The genetic backgrounds of the *comM* gene are represented for acquisition and for deletion of the *j* fragment (*comM*<sup>+</sup> in black and  $\Delta comM$  in blue). Detection limit ( $F=-8$ ) is indicated by the light grey area. Experimental events, considered as under this limit, were given the detection limit value. A regression linear model is represented for each condition, as a full line when the slope is significantly different from 0 or as a pointed line if not. Transformant frequencies represent the ratio between the number of transformants and the total number of recipient cells. The limit of detection for transformants frequencies is indicated by the grey area ( $F < 10^{-8}$ ).

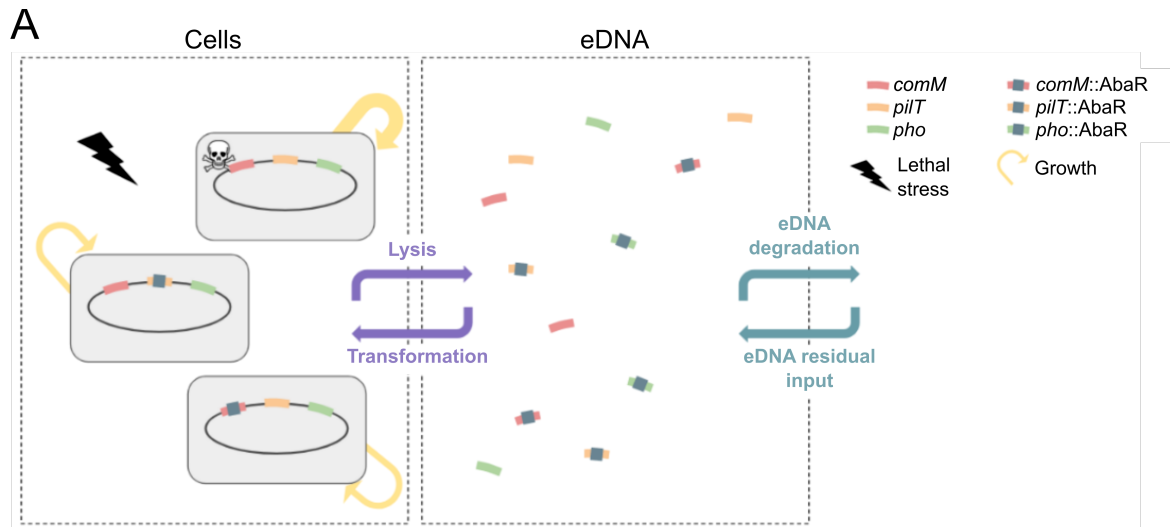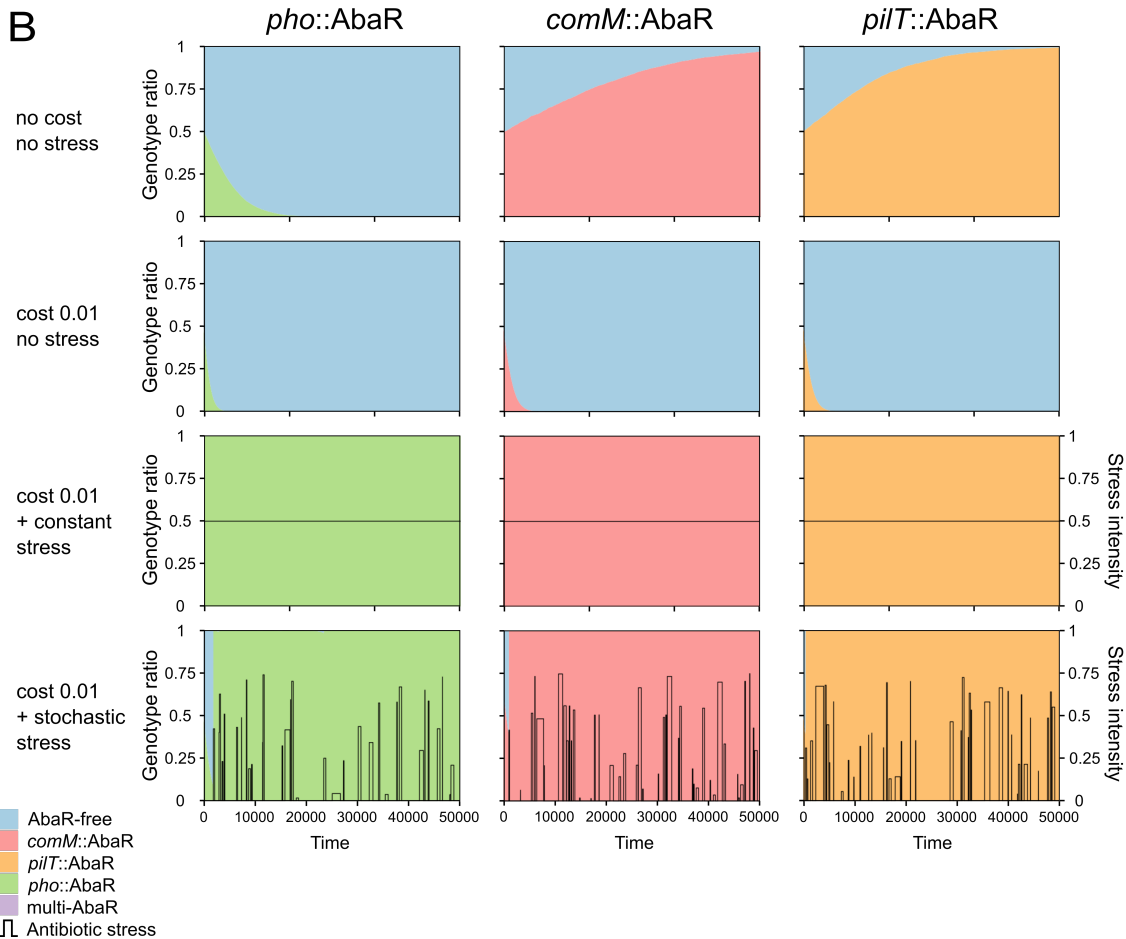

**Figure S3. A mathematical model of *A. baumannii* population involving HGT by natural transformation.** A. Schematic representation of the stochastic computational model for modeling AbaR dynamics within a bacterial population. The model comprises two compartments, one composed of bacterial cells, the other of extracellular DNA (eDNA). The bacterial population grows according to a logistic model. The bacterial cells have three AbaR insertion site in their chromosome (*comM*, *pilT*, *pho*) at which two types of alleles from the eDNA compartment can be integrated by

transformation and replace their current DNA: wild-type allele and AbaR carrying resistance (*comM*::AbaR, *pilT*::AbaR, *pho*::AbaR). The integration of a WT allele is costless for cells, whereas the integration of AbaR causes a decrease of cell replication. Bacterial populations are faced with stochastic stresses of random duration, frequency and intensity. In the absence of stress, cells are lysed at a basal rate. Under stress exposure, the lysis rate of WT cells increases but remains unchanged for cells with an AbaR carrying resistance. Each lysed cell releases its DNA and fuels the extracellular compartment with eDNA. AbaR and WT alleles are constantly added to the extracellular environment at a marginal rate simulating residual arrival from neighboring populations. The WT alleles and AbaR are degraded at a constant rate in the extracellular compartment.

B. Examples of simulated dynamics of bacterial genotypes carrying AbaR (only one type per simulation) in competition with AbaR-free cells (wild-type) represented as Mueller plots. Simulations were initialized with an equal number of AbaR-free cells and AbaR-carrying cells (either *pho*::AbaR - first column-, or *comM*::AbaR -second column-, or *pilT*::AbaR -third column-) and with an equal number of each DNA types. As AbaRs are site-specific (for example, an AbaR specialising in insertion into the *pho* gene cannot insert into the *comM* or *pilT* gene), the results in each column relate to only one AbaR type. First row, when AbaRs carry no cost and confer no antibiotic resistance. Second row, when AbaRs carry a cost on fitness (0.01) and confer resistance to a stress, but no stress is applied. Third and fourth rows, same as in the second row, but a stress is applied either continuously or stochastically.

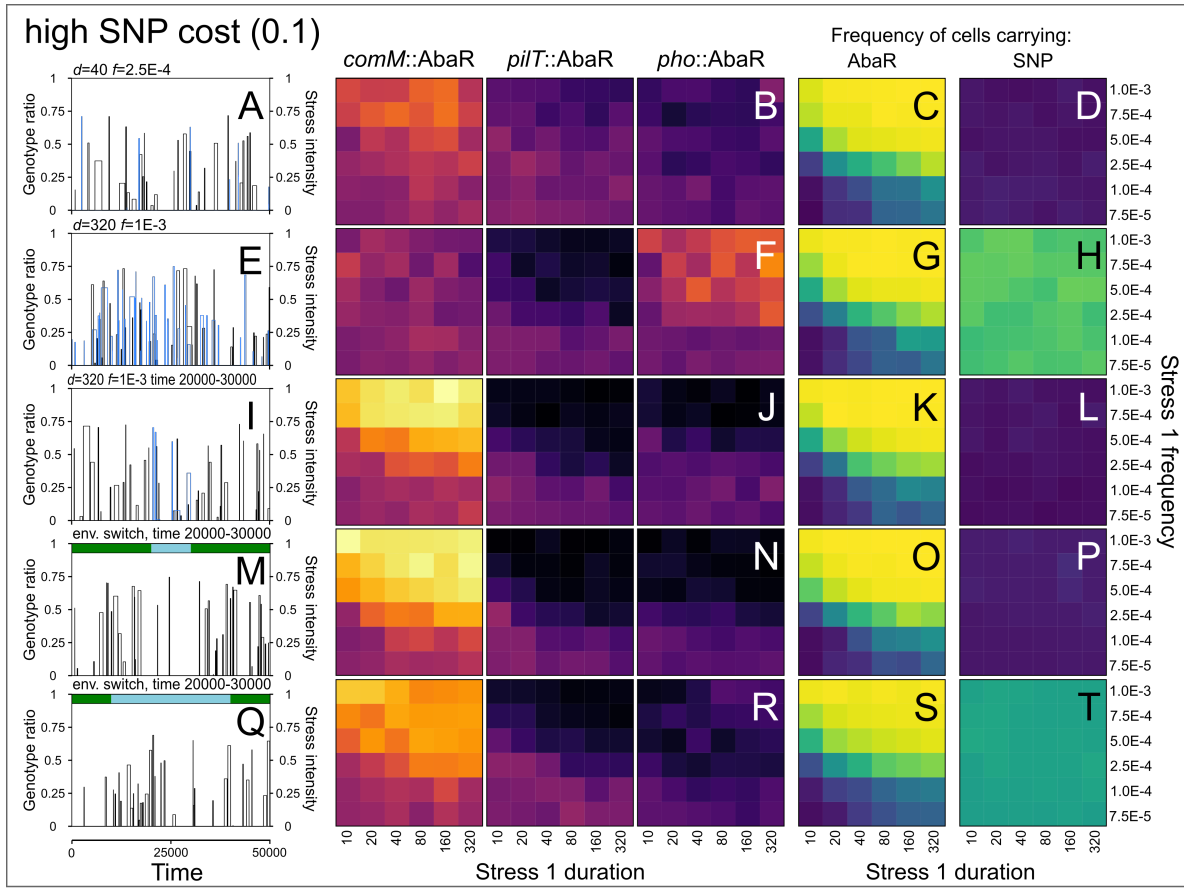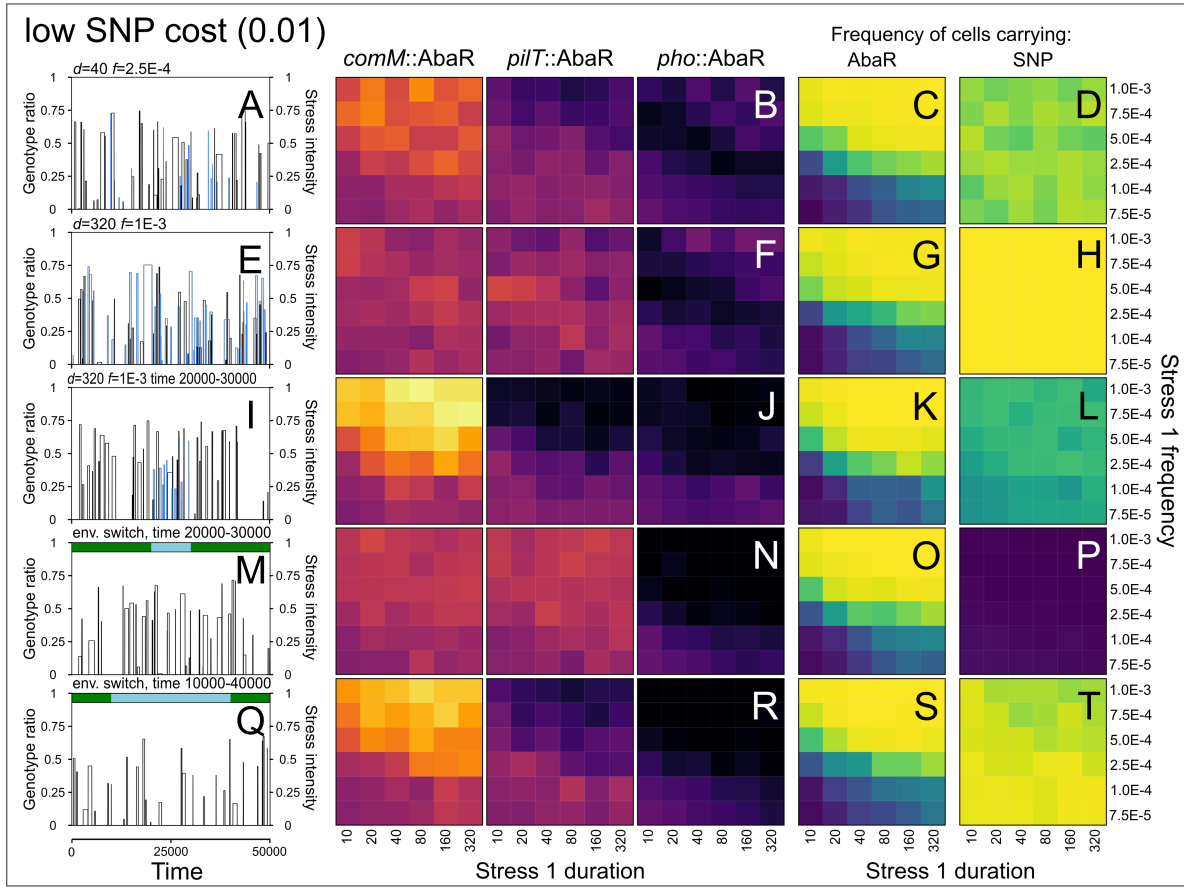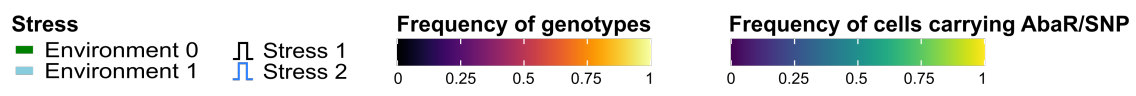



**Figure S4. Frequency of AbaR islands, island-carrying cells and SNP-carrying cells in fluctuating environments.**

This figure is an extension of figure 4 and corresponds to the results of the competition between the three types of AbaR islands, which differ in their insertion strategy (initial number of cells: AbaR-free =  $K/10$ , initial number of each eDNA type =  $K$ ), with  $K$  being the carrying capacity. Environmental fluctuations have two components: the bacterial population is exposed to stochastic stress 1 (to which resistance is conferred by AbaR) and another environmental change 2 (to which advantage is conferred by a SNP acquired by allelic transfer). The grey boxes show the dynamics of environmental change 2 (left column). In panels B, F, J, environmental change 2 corresponds to stochastic exposure to a new stress (stress 2) which from top to bottom are (B) rare and short (mean peak duration  $d=40$ , mean peak frequency  $f=2.5E-4$ ), (F) frequent and long (mean peak duration  $d=320$ , mean peak frequency  $f=1E-3$ ), and (J) frequent and long over a short period (20000-30000 time units). Lastly, environmental change 2 is not a stress but a change in resource availability occurring between 20000 and 30000 time units, or occurring between times 10000 and 40000, respectively (panel N and R). The ratio of bacterial genotypes carrying AbaR were assessed as a function of stress 1 frequency and duration. In addition to the information in Figure 4, this figure shows the frequency of AbaR-carrying cells (5th column) and the frequency of SNP-carrying cells (6th column). This figure also shows the results obtained when the cost of the SNP in terms of cell replication is low (0.01) (bottom panel), which are qualitatively similar to those presented in the main text (high cost equal to 0.1, top panel). However, when the period with the new resource is of short duration and the SNP costs are low (panel N at the bottom), there is no obvious advantage of *comM::AbaR* over *pilT::AbaR*. In the complete absence of SNP costs, we would have the same situation as in Figure 3 (without stress 2). In that sense, for a low SNP cost (0.01), and if the duration of exposure to the new environment is short (panel N) we obtain the same situation as in Figure 3. On the contrary, if exposure to the new environment is long enough, the advantage of *comM::AbaR* (which can acquire the advantageous SNP) has a significant effect and *comM::AbaR* can become fixed (panel R).

A

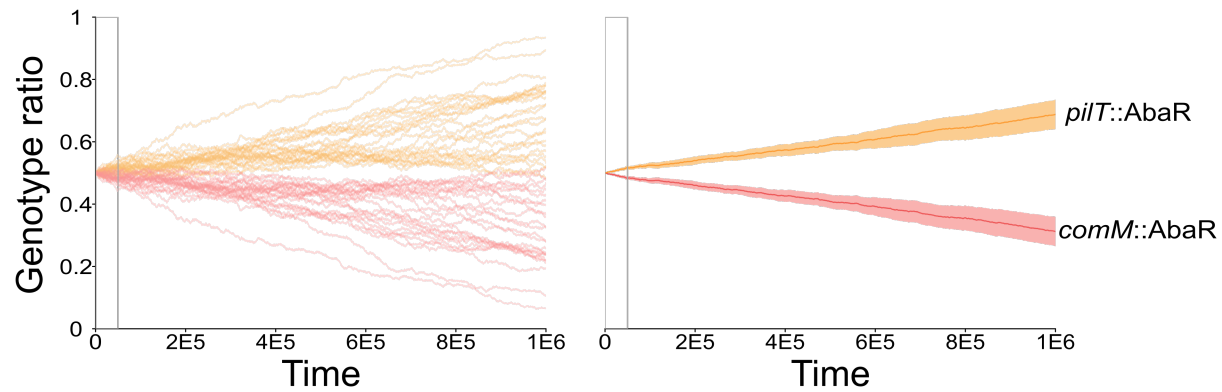

B

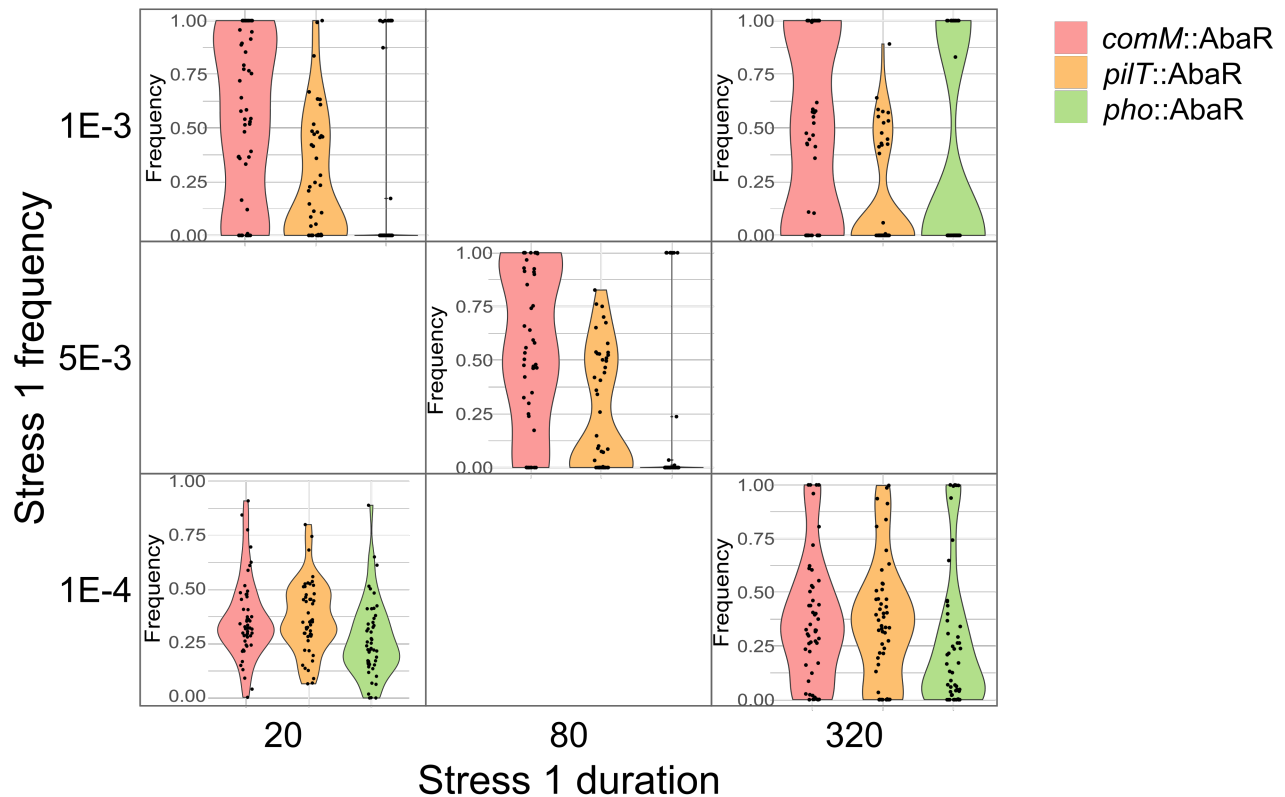

**Figure S5. Illustration of the quasi-neutrality between *comM::AbaR* and *pilT::AbaR* (panel A) and the variability between simulations in a given regime of environmental fluctuations (panel B).** A. The quasi-neutrality between *comM::AbaR* and *pilT::AbaR* is illustrated from their long-term dynamics under continuous stress (intensity 0.5). Under the initial conditions, the two genotypes are represented at the same frequency ( $K/2$  each and  $K$  molecules of each eDNA types). Left panel: 25 independent dynamics. Right panel: Mean and confidence interval (95%) of the 25 simulations. We show that over the very long term, we can detect a small

selective advantage of AbaR inserting into the *pilT* gene (which completely inhibits transformation and therefore cannot be eliminated from the genome) over AbaR inserting into *comM* (which considerably - but not totally - reduces the probability of being eliminated). This selective advantage is so small that the extinction of *comM::AbaR* never occurs in any trajectory (which lasts 1E6 time units equivalent to 1E6 generations without density dependence) and that the extinction of *comM::AbaR* in all trajectories would require an infinitely long time. B. The variability between simulations under a given regime of environmental fluctuations is illustrated from 50 simulations of the 4-sites model, with stress 2 being rare and short (Figure 4A). The different panels show the frequency distribution of the 3 AbaR genotypes (violin diagram and dots) with different stress 1 regimes. Note that when stress 1 is frequent (5E-4 or 1E-3), the *pho::AbaR* genotype becomes fixed or extinct, depending on the distribution of stress 2 along the trajectory. In that sense, the *pho::AbaR* genotype has an advantage when stress 2 becomes frequent (see figure 4B).

## 183 SI References

1. G. Carvalho, *et al.*, Bacterial Transformation Buffers Environmental Fluctuations through the Reversible Integration of Mobile Genetic Elements. *mBio* **11** (2020).
2. H. Wickham, ggplot2. *WIREs Computational Statistics* **3**, 180–185 (2011).
3. H. Wickham, Tools for Working with Categorical Variables (Factors). (2023). Available at: <https://forcats.tidyverse.org/>.
4. A. Kassambara, ggpubr: “ggplot2” Based Publication Ready Plots. (2023). Available at: <https://rpkgs.datanovia.com/ggpubr/>.
5. H. Wickham, T. L. Pedersen, D. Seidel, scales: Scale Functions for Visualization. Available at: <https://scales.r-lib.org>.
6. J. B. Harrison, J. M. Sunday, S. M. Rogers, Predicting the fate of eDNA in the environment and implications for studying biodiversity. *Proc Biol Sci* **286**, 20191409 (2019).
7. C. Niu, K. M. Clemmer, R. A. Bonomo, P. N. Rather, Isolation and Characterization of an Autoinducer Synthase from *Acinetobacter baumannii*. *J. Bacteriol.* **190**, 3386–3392 (2008).
8. G. Wilharm, J. Piesker, M. Laue, E. Skiebe, DNA uptake by the nosocomial pathogen *Acinetobacter baumannii* occurs during movement along wet surfaces. *Journal of Bacteriology* **195**, 4146–4153 (2013).
9. A.-S. Godeux, *et al.*, Fluorescence-Based Detection of Natural Transformation in Drug-Resistant *Acinetobacter baumannii*. *Journal of Bacteriology* **200**, e00181-18 (2018).
10. P.-E. Fournier, *et al.*, Comparative genomics of multidrug resistance in *Acinetobacter baumannii*. *PLoS Genet.* **2**, e7 (2006).
11. X. Charpentier, *et al.*, Chemical genetics reveals bacterial and host cell functions critical for type IV effector translocation by *Legionella pneumophila*. *PLoS Pathog* **5**, e1000501 (2009).
